# Supplementary material for: Constructing MnO 2 –CuMn 2 O 4 interfaces to enhance the activation of surface lattice oxygen for efficient toluene combustion
Source: Royal Society of Chemistry journal article supplement (doi:10.1039/d5ta06141e), 2025-01-01
Supplement: d5ta06141e1.pdf [file d5ta06141e1.pdf]

## Supporting Information

### Constructing MnO<sub>2</sub>-CuMn<sub>2</sub>O<sub>4</sub> interfaces to enhance the activation of surface lattice oxygen for efficient toluene combustion

Qiuyan Zhang, Yu Wu, Hongwei Jian, Aijie Wang, Haojie Yang, Chong Han\*

School of Metallurgy, Northeastern University, Shenyang, 110819, China

#### Preparation of Comparative Catalysts

To systematically optimize the hydrothermal synthesis process of the catalyst, this study investigated the effects of key synthesis parameters. Firstly, a series of MnO<sub>2</sub>/CMO samples was synthesized at different hydrothermal temperatures (120, 140, and 180 °C), while keeping all other steps consistent with the preparation method of MnO<sub>2</sub>/CMO. Secondly, to determine the optimal amount of KMnO<sub>4</sub>, the samples were prepared using KMnO<sub>4</sub> solutions with concentrations of 0.03 and 0.18 mol L<sup>-1</sup>. The other preparation steps were identical to those for MnO<sub>2</sub>/CMO.

To exclude the influence of water on CMO under hydrothermal conditions, the W-CMO catalyst was prepared. 0.6 g CMO was added to 50 mL deionized water and stirred at room temperature for 1 h. The suspension was transferred to a 100 mL Teflon-lined autoclave and heated to 160 °C for 3 h. The subsequent synthesis steps were identical to those of MnO<sub>2</sub>/CMO.

To verify the interfacial effect of the interaction between MnO<sub>2</sub> and CuMn<sub>2</sub>O<sub>4</sub>, the Mix-M+C was synthesized by physically mixing the as-prepared MnO<sub>2</sub> and CuMn<sub>2</sub>O<sub>4</sub> at the actual ratio of MnO<sub>2</sub> to CuMn<sub>2</sub>O<sub>4</sub> in MnO<sub>2</sub>/CMO (the ratio calculated by the ICP analysis).

#### Characterization methods

X-ray diffraction (XRD) was conducted using a D8 Advance powder diffractometer (Bruker,

---

\* Corresponding author.

*E-mail address:* hanch@smm.neu.edu.cn (C. Han).

Germany). Raman spectroscopy was performed using an in Via confocal Raman microscope (Renishaw, UK) with an excitation wavelength of 532 nm. N<sub>2</sub> adsorption-desorption isotherm tests were performed by using a Nova 1200e analyzer (Quantachrome, USA) at 77 K. The Barrett-Joyner-Halenda (BJH) method was employed to determine pore size distributions. Inductively coupled plasma optical emission spectroscopy (ICP-OES) was performed on an Optima 8300DV instrument. Field emission scanning electron microscopy (FESEM) and energy dispersive spectrometer (EDS) were performed on an Ultra Plus (Zeiss, Germany) at an accelerating voltage of 20 kV. High-resolution transmission electron microscopy (HRTEM) images were recorded on a Tecnai G2 F20 (FEI, USA) at an accelerating voltage of 200 kV. X-ray photoelectron spectroscopy (XPS) was performed on an ESCALAB 250Xi electron spectrometer (Thermo Fisher Scientific, USA) with a monochromatic Al K $\alpha$  source ( $h\nu = 1486.6$  eV). The binding energies of all elements were referenced to the C 1s line at 284.8 eV from carbon impurities.

Temperature-programmed reduction and temperature-programmed desorption experiments were carried out on a chemical adsorption analyzer (ChemiMaster 8320, China). For hydrogen temperature-programmed reduction (H<sub>2</sub>-TPR) experiments, 50 mg of sample was placed in a U-shaped quartz tube and pretreated at 200 °C for 1 h under Ar flows (30 mL min<sup>-1</sup>). Then, the reduction of the samples was initiated from 50 to 900 °C (10 °C min<sup>-1</sup>) in 5% H<sub>2</sub>/Ar flow. Meanwhile, the H<sub>2</sub> consumption was recorded by a TCD while the temperature gradually increased to 900 °C. For the oxygen temperature-programmed desorption (O<sub>2</sub>-TPD) measurement, 50 mg of the sample was pretreated in He flows (30 mL min<sup>-1</sup>) at 200 °C for 1 h. The O<sub>2</sub> adsorption was conducted at 50 °C, with the exposure of 5% O<sub>2</sub>/He (30 mL min<sup>-1</sup>) for 60 min. After that, physically adsorbed O<sub>2</sub> was removed by He for 30 min. Finally, the O<sub>2</sub> desorption process was carried out in a He stream with temperatures linearly increasing from 50 to 900 °C (10 °C min<sup>-1</sup>). The effluent gases were determined by an on-line mass spectrometer (PM-QMS, China). The signals at mass-to-charge ( $m/z$ ) ratios of 32 (O<sub>2</sub>) were detected. For the Toluene-TPD experiment, 50 mg of the sample was pretreated in He flows (30 mL min<sup>-1</sup>) at 200 °C for 1 h. After the temperature cooled to 50 °C, the samples were placed in 1500 ppm of toluene for 1 h. The physically adsorbed toluene was removed by He for 30 min. Finally, the toluene desorption process was carried out in a He stream with temperatures

linearly increasing from 50 to 600 °C (10 °C min<sup>-1</sup>). The toluene and CO<sub>2</sub> signals ( $m/z = 92$ ,  $m/z = 44$ ) were recorded using the MS detector. The toluene temperature-programmed surface reaction (Toluene-TPSR) involved the adsorption of toluene being saturated on the catalyst, followed by purging off the weakly adsorbed toluene with a He stream, and then heating in a 5% O<sub>2</sub>/He flow from 50 to 600 °C (10 °C min<sup>-1</sup>).

*In situ* diffuse reflectance infrared Fourier transform spectroscopy (DRIFTS, IS50, Thermo Fisher Scientific Inc., USA) was used to analyze toluene adsorption and oxidation mechanisms on catalysts. Before the experiment, the sample was treated in an N<sub>2</sub> flow (50 mL min<sup>-1</sup>) at 250 °C for 1 h to remove surface impurities from the catalysts. In the temperature-dependent experiment, the background spectra were collected in the N<sub>2</sub> atmosphere at room temperature. The gas flow was then switched to a reaction gas containing 500 ppm toluene (20% O<sub>2</sub> + N<sub>2</sub>) at the same flow rate. The spectra of the products formed on the catalyst surface were continuously recorded as the catalyst was heated to 160 °C, 180 °C, 200 °C, 220 °C and 240 °C. To evaluate the lattice oxygen activity and gaseous oxygen activation levels of the catalysts, the catalysts were exposed to an atmosphere containing 500 ppm toluene under both oxygen-free and air conditions, and the accumulation of intermediates was monitored by *in situ* DRIFTS. The water resistance stability experiment was conducted under an air atmosphere containing 1.5 vol% water and 500 ppm toluene.

## DFT calculations

All spin-polarized density functional theory calculations were conducted by the Vienna Ab initio simulation package (VASP). The exchange-correlation potential was described by using the generalized gradient approximation of Perdew-Burke-Ernzerhof (GGA-PBE). Dispersion interactions were described using the Grimme DFT-D3 method. The ion cores and valence electrons were depicted by the projector augmented-wave (PAW) method, and the plane-wave cutoff energy was set to 450 eV. The Monkhorst-Pack k-points grid was specified as  $1 \times 1 \times 1$  during the calculations. The given structural models were optimized until the Hellmann-Feynman forces were smaller than  $-0.02$  eV/Å and the energy change was less than  $10^{-5}$  eV. The (220) crystal plane of CuMn<sub>2</sub>O<sub>4</sub> was chosen as the most stable plane for calculation. The model consisted of 16 Cu atoms and 32 Mn atoms. For MnO<sub>2</sub>, the (001) crystal plane was

selected as the most stable plane, with a model consisting of 4 Mn atoms and 8 O atoms. Only one side of the exposed surface was permitted for the adsorption.

The oxygen vacancy formation energy ( $E_{VO}$ ) was calculated as:

$$E_{VO}=E_d-E_p+E_{O_2}/2$$

where  $E_d$  and  $E_p$  are the energy of the defective and perfect slab surface, respectively.  $E_{O_2}/2$  is the energy of gaseous oxygen molecule.

The adsorption energy ( $E_{ads}$ ) of A (toluene and  $O_2$ ) on the catalysts were calculated as:

$$E_{ads}=E_{A/catalyst}-E_{catalyst}-E_A$$

where  $E_{A/catalyst}$  and  $E_{catalyst}$  are the energy of the catalyst with A adsorption and without A adsorption, respectively.  $E_A$  is the energy of gaseous toluene or oxygen molecules.

The Density of States (DOS) projected onto the d-states that interact with the adsorbate state was characterized by the moments of the d-PDOS, with the first moment representing the d-band center:

$$\text{d-band center} = \frac{\int_{-\infty}^{\infty} n_d(\epsilon)\epsilon d\epsilon}{\int_{-\infty}^{\infty} n_d(\epsilon) d\epsilon}$$

where  $n_d(\epsilon)$  and  $\epsilon$  refer to the electron density and electron energy with respect to the Fermi level, respectively. The calculation method for the p-band center follows a similar formula.

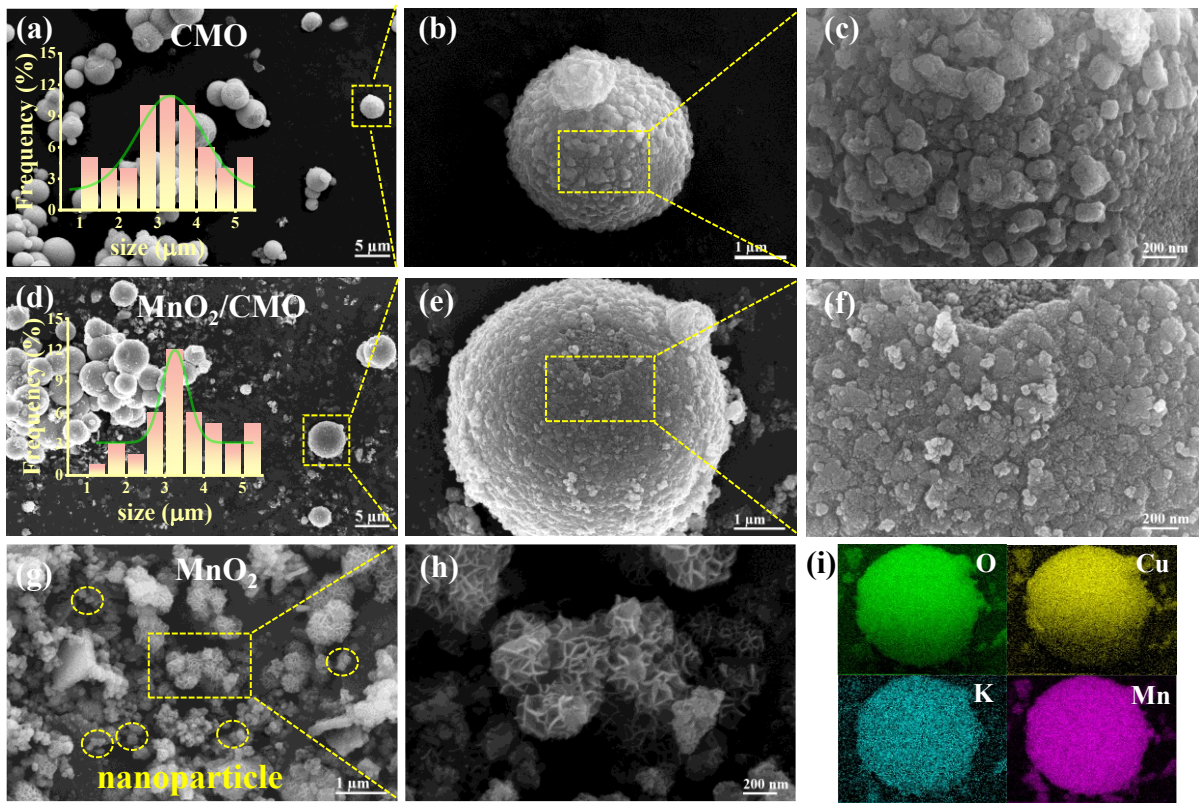

**Fig. S1** SEM images of CMO (a, b, c), MnO<sub>2</sub>/CMO (d, e, f) and MnO<sub>2</sub> (g, h); (i) elemental mapping images of MnO<sub>2</sub>/CMO.

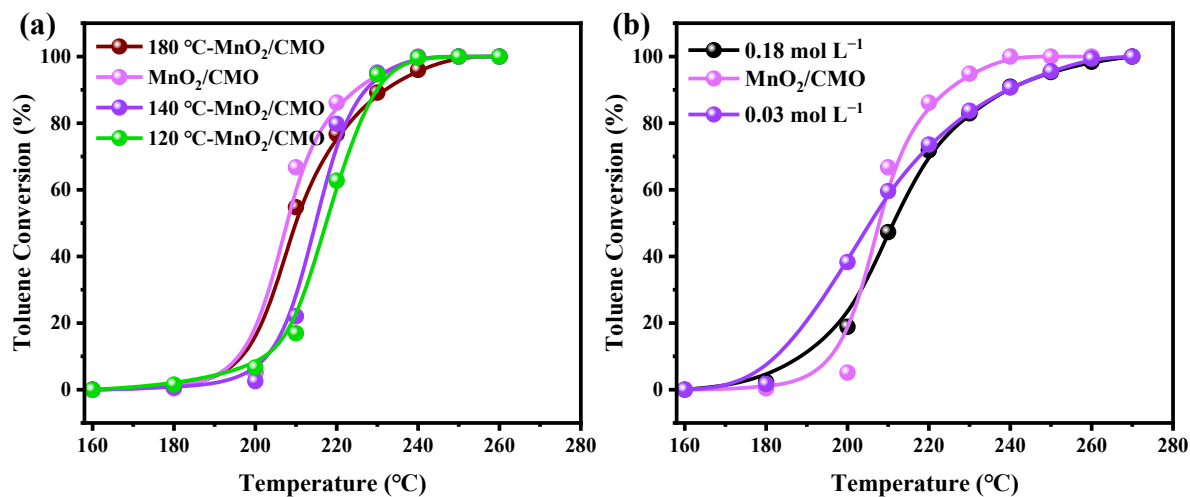

**Fig. S2** Catalytic combustion performance of toluene on the catalysts prepared at different (a) hydrothermal temperatures and (b) KMnO<sub>4</sub> concentrations.

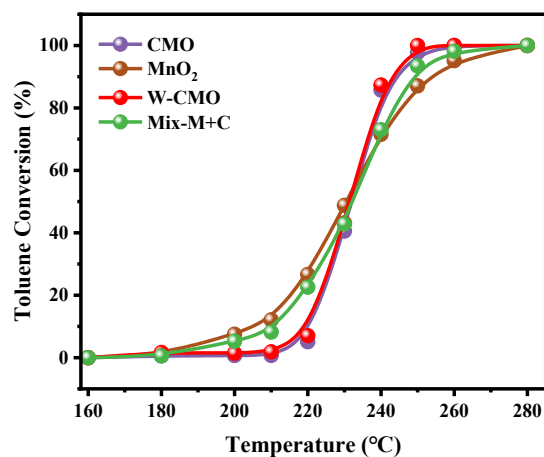

**Fig. S3** Conversion of toluene by various catalysts.

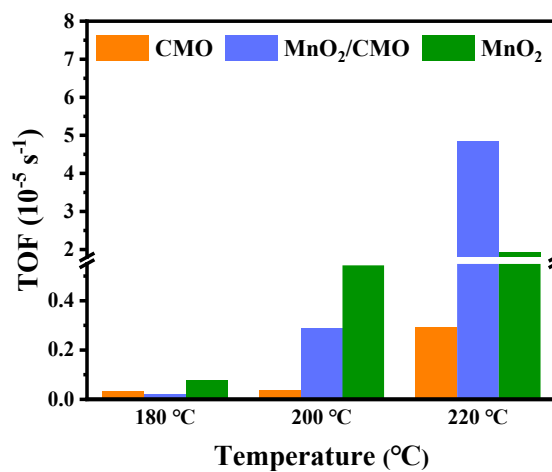

**Fig. S4** Turnover frequency (TOF) of catalysts.

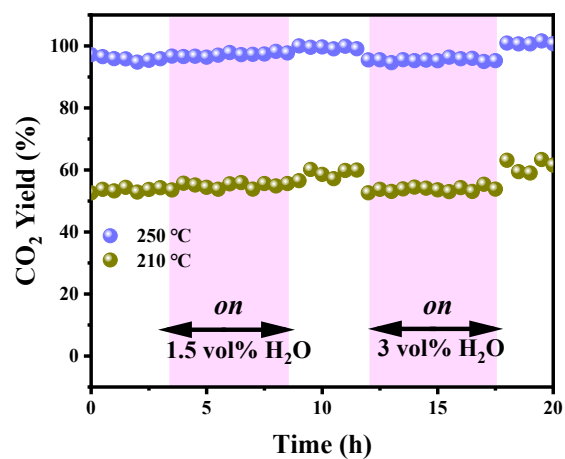

**Fig. S5** Effect of water vapor on CO<sub>2</sub> yield of MnO<sub>2</sub>/CMO.

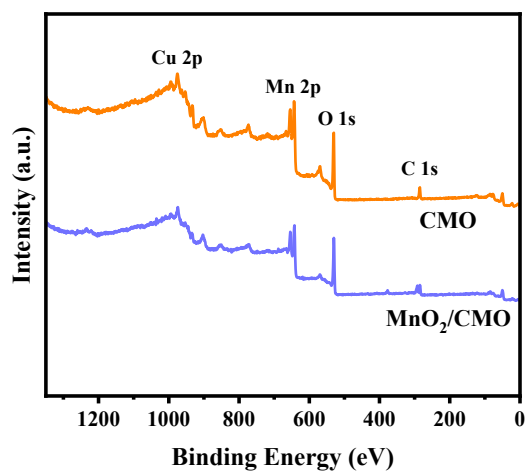

**Fig. S6** XPS survey spectra of CMO and MnO<sub>2</sub>/CMO.

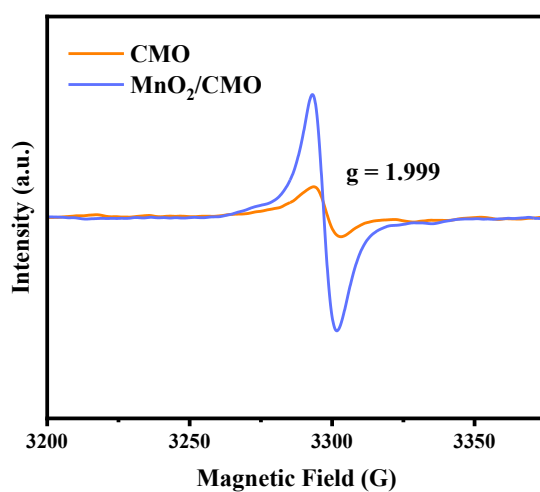

**Fig. S7** EPR spectra of CMO and MnO<sub>2</sub>/CMO.

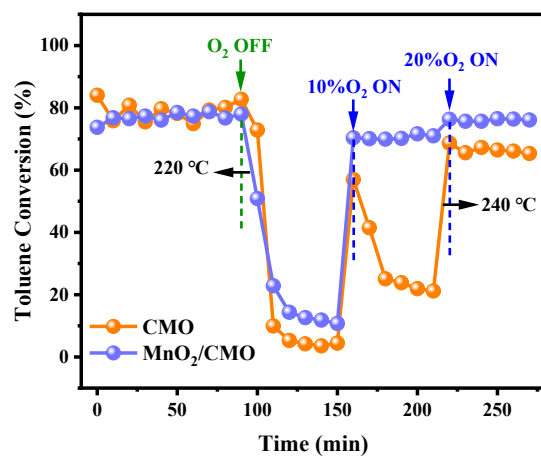

**Fig. S8** Toluene conversion of CMO and MnO<sub>2</sub>/CMO in O<sub>2</sub>-free reaction as a function of time.

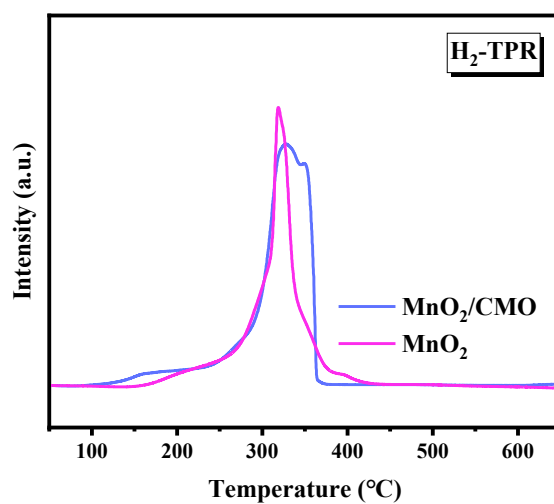

**Fig. S9** H<sub>2</sub>-TPR profiles of CMO and MnO<sub>2</sub>/CMO.



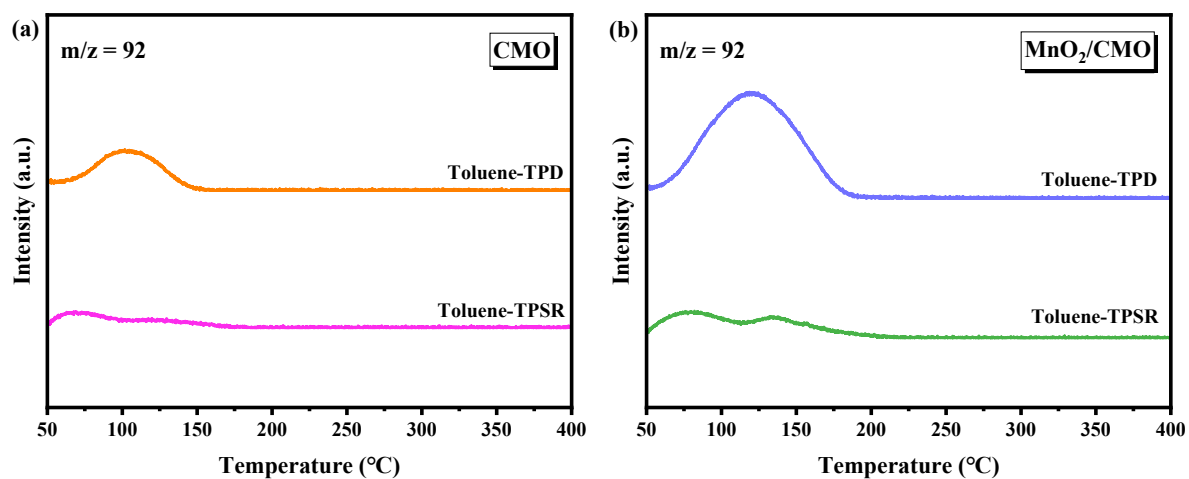

**Fig. S10** Toluene MS signals of CMO (a) and  $\text{MnO}_2/\text{CMO}$  (b) during Toluene-TPD and Toluene-TPSR experiments.

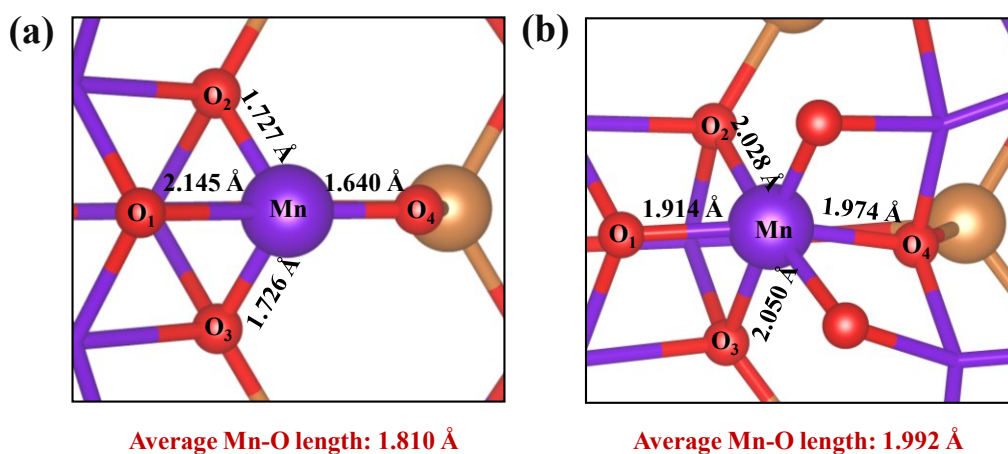

**Fig. S11** Mn-O bond length of CMO (a) and  $\text{MnO}_2/\text{CMO}$  (b).

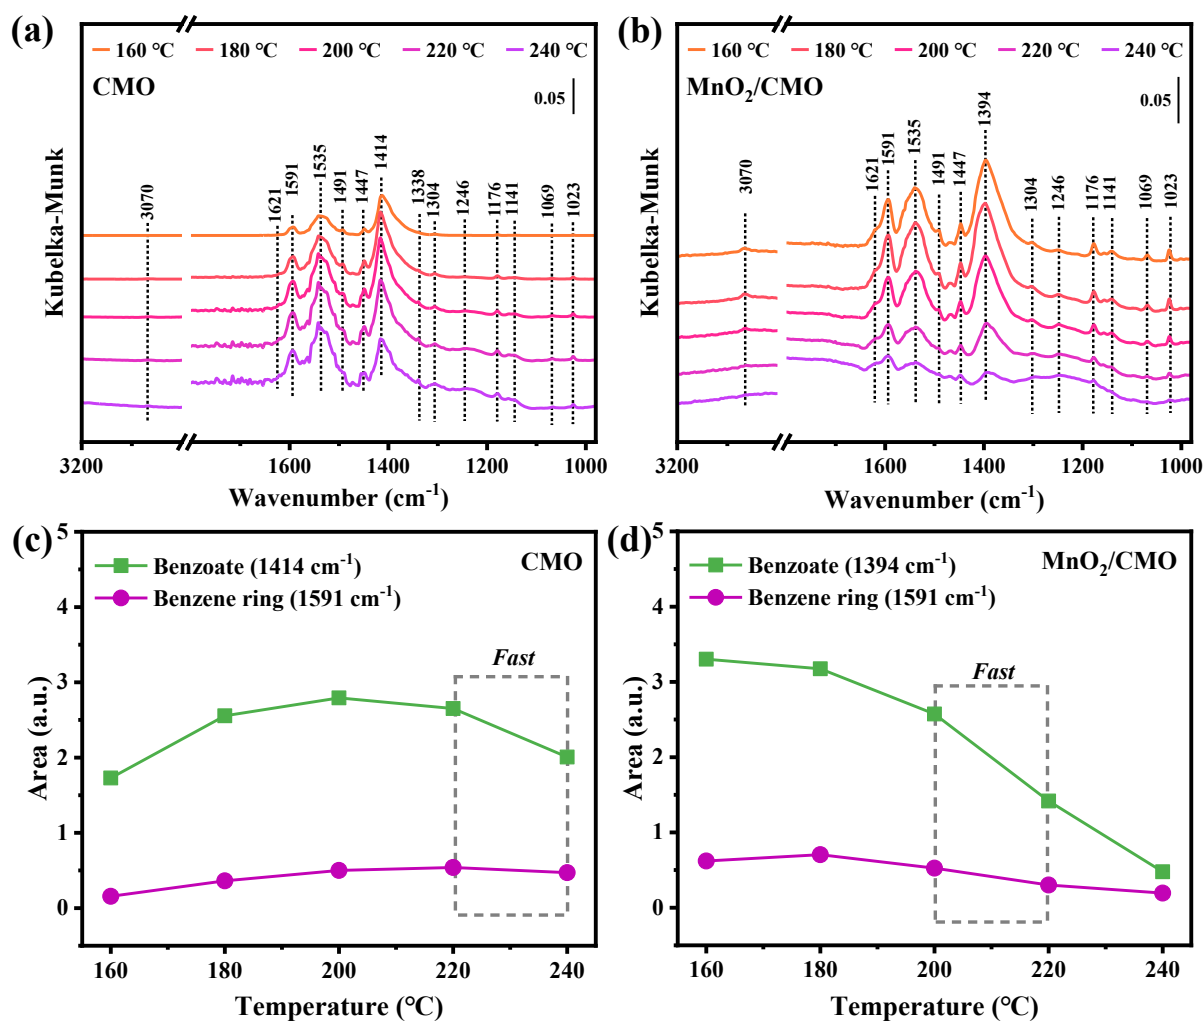

**Fig. S12** (a, b) *In-situ* DRIFTS spectra and (c, d) plots of consumption of benzene ring and benzoate over CMO and MnO<sub>2</sub>/CMO during toluene oxidation from 160 to 240 °C.

**Table S1** EDS, ICP analysis of the catalysts.

| Sample                             | EDS (wt%) |       |      |                                       | ICP (wt%) |       |      |                                       |
|------------------------------------|-----------|-------|------|---------------------------------------|-----------|-------|------|---------------------------------------|
|                                    | Cu        | Mn    | K    | K/MnO <sub>2</sub><br>atomic<br>ratio | Cu        | Mn    | K    | K/MnO <sub>2</sub><br>atomic<br>ratio |
| CMO                                | 22.3      | 40.24 | /    | /                                     | 28.25     | 39.77 | /    | /                                     |
| MnO <sub>2</sub> /CMO <sup>a</sup> | 20.4      | 46.1  | 1.62 | 0.25                                  | 24.1      | 44.6  | 1.69 | 0.22                                  |
| MnO <sub>2</sub>                   | /         | 47.28 | 7.92 | 0.24                                  | /         | 51.5  | 9.92 | 0.21                                  |

<sup>a</sup>It was assumed that the MnO<sub>2</sub>/CMO only consisted of CuMn<sub>2</sub>O<sub>4</sub> spinel and MnO<sub>2</sub> phases.

**Table S2** The catalytic oxidation activities of VOCs by the reported catalysts.

| Catalysts                              | VOCs    | Concentration<br>(ppm) | GHSV<br>(mL g <sup>-1</sup> h <sup>-1</sup> ) | T <sub>90%</sub><br>(°C) | Ref.      |
|----------------------------------------|---------|------------------------|-----------------------------------------------|--------------------------|-----------|
| MnO <sub>2</sub> /CMO                  | toluene | 1000                   | 60,000                                        | 223                      | This work |
| CFO-N-I                                | toluene | 1000                   | 30,000                                        | 280                      | 1         |
| Co <sub>1</sub> /MnO <sub>2</sub>      | toluene | 1000                   | 60,000                                        | 260                      | 2         |
| CuO-MnO <sub>x</sub>                   | toluene | 1000                   | 60,000                                        | 225                      | 3         |
| Co <sub>3</sub> O <sub>4</sub> /Fe-S   | toluene | 100                    | 15,000                                        | 256                      | 4         |
| CMO-AC45                               | toluene | 1000                   | 60,000                                        | ~245                     | 5         |
| Mn <sub>2</sub> O <sub>3</sub> -T-0.5  | toluene | 1000                   | 60,000                                        | 252                      | 6         |
| 4% Ag/MnO <sub>2</sub>                 | toluene | 1000                   | 20,000                                        | ~215                     | 7         |
| Ag/δ-MnO <sub>2</sub>                  | toluene | 1000                   | 60,000                                        | 224                      | 8         |
| Au/3DOM Mn <sub>2</sub> O <sub>3</sub> | toluene | 1000                   | 40,000                                        | 244                      | 9         |

**Table S3** Summary of XPS analysis results.

| Sample                | Cu <sup>+</sup> /Cu | Mn <sup>4+</sup> /Mn <sup>3+</sup> | AOS <sup>a</sup> | O <sub>V</sub> /(O <sub>L</sub> + O <sub>V</sub> ) |
|-----------------------|---------------------|------------------------------------|------------------|----------------------------------------------------|
| CMO                   | 0.39                | 0.33                               | 3.281            | 0.376                                              |
| MnO <sub>2</sub> /CMO | 0.18                | 0.65                               | 3.314            | 0.393                                              |

<sup>a</sup>The AOS of Mn was accurately calculated by the equation:  $\text{AOS} = 8.956 - 1.126\Delta E$ , where  $\Delta E$  denoted the binding energy difference of two peaks for Mn 3s.

**Table S4** The valence band center of Cu 3d, Mn 3d and O 2p on catalysts.

| Sample                | Cu 3d    | Mn 3d    | O 2p     |
|-----------------------|----------|----------|----------|
| CMO                   | -1.94 eV | -1.14 eV | -3.10 eV |
| MnO <sub>2</sub> /CMO | -1.73 eV | -1.05 eV | -2.89 eV |

## References

- 1 D. Zhu, Y. Huang, R. Li, S. Peng, P. Wang and J. Cao, *Environ. Sci. Technol.*, 2023, **57**, 17598–17609.
- 2 M. Jiang, D. Yan, X. Lv, Y. Gao and H. Jia, *Appl. Catal. B.*, 2022, **319**, 121962.
- 3 S. Xiong, N. Huang, Y. Peng, J. Chen and J. Li, *J. Hazard. Mater.*, 2021, **415**, 125637.
- 4 R. Li, Y. Huang, Y. Zhu, M. Guo, W. Peng, Y. Zhi, L. Wang, J. Cao and S. Lee, *Environ. Sci. Technol.*, 2024, **58**, 14906–14917.
- 5 Y. Yang, W. Si, Y. Peng, J. Chen, Y. Wang, D. Chen, Z. Tian, J. Wang and J. Li, *Appl. Catal. B.*, 2024, **340**, 123142.
- 6 W. Yang, Y. Peng, Y. Wang, Y. Wang, H. Liu, Z. Su, W. Yang, J. Chen, W. Si and J. Li, *Appl. Catal. B.*, 2020, **278**, 119279.
- 7 Y. Qin, Y. Wang, J. Li and Z. Qu, *Surf. Interf.*, 2020, **21**, 100657.
- 8 W. Yang, X. Zhao, Y. Wang, X. Wang, H. Liu, W. Yang, H. Zhou, Y. A. Wu, C. Sun, Y. Peng and J. Li, *Catal. Sci. Technol.*, 2022, **12**, 5932–5941.
- 9 S. Xie, H. Dai, J. Deng, H. Yang, W. Han, H. Arandiyani and G. Guo, *J. Hazard. Mater.*, 2014, **279**, 392–401.
